# Supplementary material for: Printed Composite Film with Porous/ Micropyramide Hybrid Conductive Architecture for Multifunctional Flexible Force Sensor
Source: Preprints.org preprint supplement (doi:10.20944/preprints202311.1301.v1), 2023-11-21
Supplement: Supplementary file 1 [file supplementary]

## **Supporting Information**

### **Printed Composite Film with Porous/ Micropyramide Hybrid Conductive Architecture for Multifunctional Flexible Force Sensor**

Yi-Fei Wang \*, Junya Yoshida, Yasunori Takeda, Ayako Yoshida, Takeru Kaneko, Tomohito Sekine, Dasuike Kumaki, Shizuo Tokito \*

Research Center for Organic Electronics (ROEL), Yamagata University, 4-3-16, Jonan, Yonezawa, Yamagata, 992-8510 Japan.

E-mail: wang@yz.yamagata-u.ac.jp (Y. F. Wang); tokito@yz.yamagata-u.ac.jp (S. Tokito).

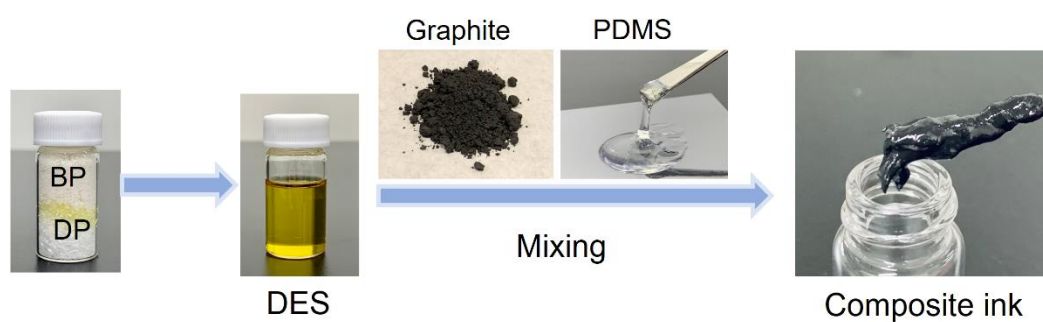

**Figure S1.** The synthesis process of the printed composite ink

**Table S1.** Component of the printable composite inks

| Inks  | PDMS (g) | DES (g) | Graphite (g) |
|-------|----------|---------|--------------|
| Ink-0 | 1        | 0       | 1.25         |
| Ink-1 | 1        | 1       | 0.5          |
| Ink-2 | 1        | 1       | 0.75         |
| Ink-3 | 1        | 1       | 1.0          |
| Ink-4 | 1        | 1       | 1.25         |
| Ink-5 | 1        | 1       | 1.37         |

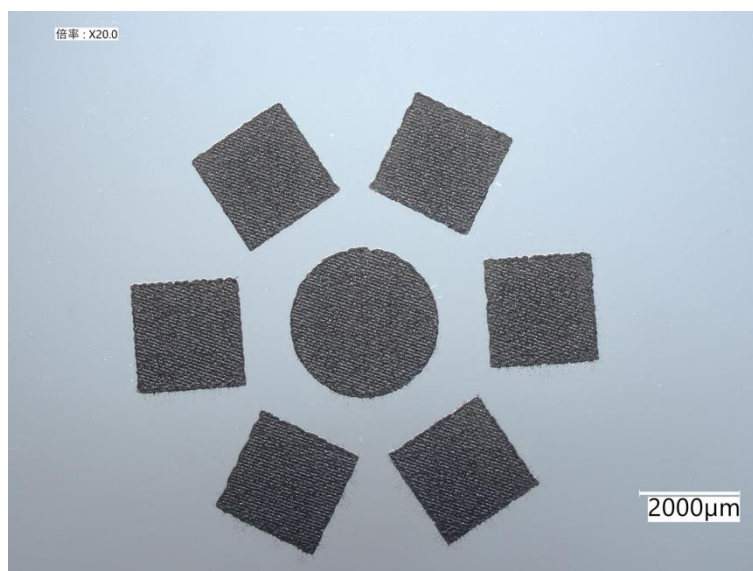

**Figure S2.** A printed sensing layer with pattern feature of 2 mm by 2 mm.

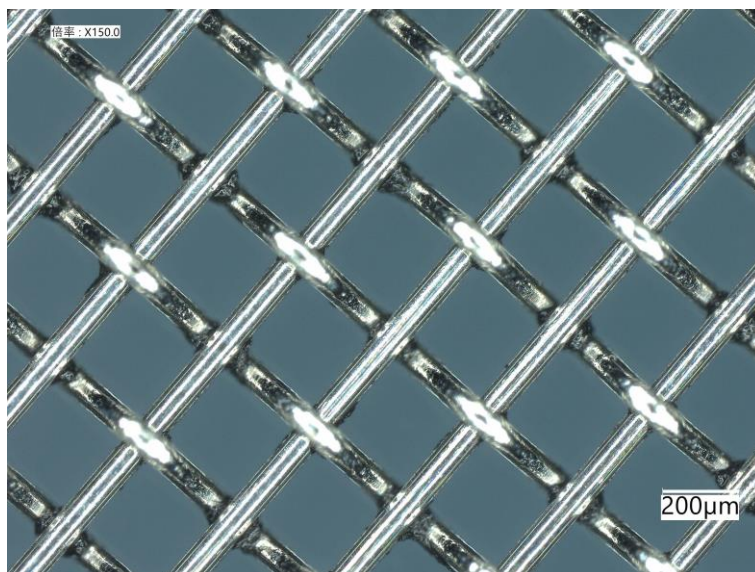

**Figure S3.** Optical microscopy image of the screen mesh mask.

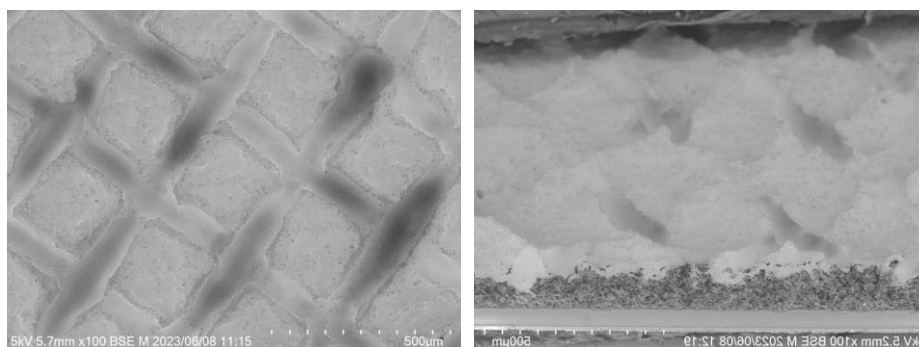

**Figure S4.** SEM images of Ink-5 with high loading of Graphite taken from the surface (left) and a 45-degree observation angle (right).

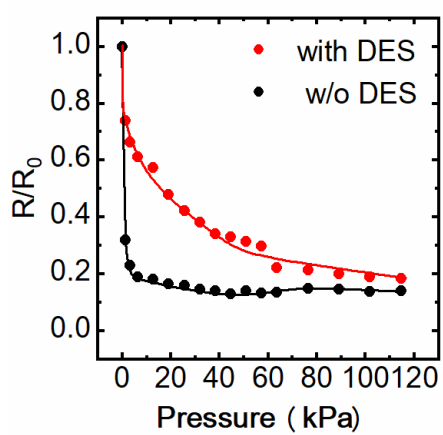

**Figure S5.** Comparison of performance of inks with DES (ink-4) and without DES (ink-0).
